# Supplementary material for: In Vitro Activity of Robenidine Analogues NCL259 and NCL265 against Gram-Negative Pathogens
Source: MDPI journal article supplement (doi:10.3390/antibiotics11101301), 2022-09-23
Supplement: s1 [file s1]

**Table S1.** NCL259 in combination with PAβN against *K. pneumoniae* 13GNB-429.

| NCL259<br>(μg/mL) | Replicate 1 |   |   |   |    |    | Replicate 2 |   |   |   |    |    | NCL259<br>(μg/mL) |
|-------------------|-------------|---|---|---|----|----|-------------|---|---|---|----|----|-------------------|
| 128               |             |   |   |   |    |    |             |   |   |   |    |    | 128               |
| 64                |             |   |   |   |    |    |             |   |   |   |    |    | 64                |
| 32                |             |   |   |   |    |    |             |   |   |   |    |    | 32                |
| 16                |             |   |   | 1 |    |    |             |   |   | 2 |    |    | 16                |
| 8                 |             |   |   |   |    |    |             |   |   |   |    |    | 8                 |
| 4                 |             |   |   |   |    |    |             |   |   |   |    |    | 4                 |
| 2                 |             |   |   |   |    |    |             |   |   |   |    |    | 2                 |
| 1                 |             |   |   |   |    |    |             |   |   |   |    |    | 1                 |
|                   | 0           | 2 | 4 | 8 | 16 | 32 | 0           | 2 | 4 | 8 | 16 | 32 |                   |
| PAβN (μg/mL)      |             |   |   |   |    |    |             |   |   |   |    |    |                   |

<sup>1</sup> The synergistic interaction of NCL259 at 16 μg/mL and PAβN at 8 μg/mL; <sup>2</sup> the synergistic interaction of NCL259 at 16 μg/mL and PAβN at 8 μg/mL in replicate. Blue and pink indicate the absence or presence of living colonies, respectively.

**Table S2.** NCL259 in combination with PAβN against *K. pneumoniae* 13GNB-550.

| NCL259<br>(μg/mL) | Replicate 1 |   |   |   |    |    | Replicate 2 |   |   |   |    |    | NCL259<br>(μg/mL) |
|-------------------|-------------|---|---|---|----|----|-------------|---|---|---|----|----|-------------------|
| 128               |             |   |   |   |    |    |             |   |   |   |    |    | 128               |
| 64                |             |   |   |   |    |    |             |   |   |   |    |    | 64                |
| 32                |             |   |   |   |    |    |             |   |   |   |    |    | 32                |
| 16                |             |   |   |   | 1  |    |             |   |   | 2 |    |    | 16                |
| 8                 |             |   |   |   |    |    |             |   |   |   |    |    | 8                 |
| 4                 |             |   |   |   |    |    |             |   |   |   |    |    | 4                 |
| 2                 |             |   |   |   |    |    |             |   |   |   |    |    | 2                 |
| 1                 |             |   |   |   |    |    |             |   |   |   |    |    | 1                 |
|                   | 0           | 2 | 4 | 8 | 16 | 32 | 0           | 2 | 4 | 8 | 16 | 32 |                   |
| PAβN (μg/mL)      |             |   |   |   |    |    |             |   |   |   |    |    |                   |

<sup>1</sup> The additive interaction of NCL259 at 16 μg/mL and PAβN at 16 μg/mL; <sup>2</sup> the synergistic interaction of NCL259 at 16 μg/mL and PAβN at 8 μg/mL in replicate. Blue and pink indicate the absence or presence of living colonies, respectively.

**Table S3.** NCL259 in combination with PAβN against *K. oxytoca* 13GNB-582.

| NCL259<br>(μg/mL) | Replicate 1  |   |   |   |    |    | Replicate 2  |   |   |   |    |    | NCL259<br>(μg/mL) |
|-------------------|--------------|---|---|---|----|----|--------------|---|---|---|----|----|-------------------|
| 128               |              |   |   |   |    |    |              |   |   |   |    |    | 128               |
| 64                |              |   |   |   |    |    |              |   |   |   |    |    | 64                |
| 32                |              |   |   |   |    |    |              |   |   |   |    |    | 32                |
| 16                |              |   |   |   |    |    |              |   |   |   |    |    | 16                |
| 8                 |              |   |   | 1 |    |    |              |   |   | 2 |    |    | 8                 |
| 4                 |              |   |   |   |    |    |              |   |   |   |    |    | 4                 |
| 2                 |              |   |   |   |    |    |              |   |   |   |    |    | 2                 |
| 1                 |              |   |   |   |    |    |              |   |   |   |    |    | 1                 |
|                   | 1            | 2 | 4 | 8 | 16 | 32 | 1            | 2 | 4 | 8 | 16 | 32 |                   |
|                   | PAβN (μg/mL) |   |   |   |    |    | PAβN (μg/mL) |   |   |   |    |    |                   |

<sup>1</sup> The synergistic interaction of NCL259 at 8 μg/mL and PAβN at 8 μg/mL; <sup>2</sup> the synergistic interaction of NCL259 at 8 μg/mL and PAβN at 8 μg/mL in replicate. Blue and pink indicate the absence or presence of living colonies, respectively.

**Table S4.** NCL265 in combination with PAβN against *K. pneumoniae* 13GNB-429.

| NCL265<br>(μg/mL) | Replicate 1  |   |   |   |    |    | Replicate 2  |   |   |   |    |    | NCL265<br>(μg/mL) |
|-------------------|--------------|---|---|---|----|----|--------------|---|---|---|----|----|-------------------|
| 128               |              |   |   |   |    |    |              |   |   |   |    |    | 128               |
| 64                |              |   |   |   |    |    |              |   |   |   |    |    | 64                |
| 32                |              |   |   |   |    |    |              |   |   |   |    |    | 32                |
| 16                |              |   |   |   |    |    |              |   |   |   |    |    | 16                |
| 8                 |              |   |   | 1 |    |    |              |   | 2 |   |    |    | 8                 |
| 4                 |              |   |   |   |    |    |              |   |   |   |    |    | 4                 |
| 2                 |              |   |   |   |    |    |              |   |   |   |    |    | 2                 |
| 1                 |              |   |   |   |    |    |              |   |   |   |    |    | 1                 |
|                   | 0            | 2 | 4 | 8 | 16 | 32 | 0            | 2 | 4 | 8 | 16 | 32 |                   |
|                   | PAβN (μg/mL) |   |   |   |    |    | PAβN (μg/mL) |   |   |   |    |    |                   |

<sup>1</sup> The synergistic interaction of NCL265 at 8 μg/mL and PAβN at 8 μg/mL; <sup>2</sup> the synergistic interaction of NCL265 at 8 μg/mL and PAβN at 4 μg/mL in replicate. Blue and pink indicate the absence or presence of living colonies, respectively.

**Table S5.** NCL265 in combination with PAβN against *K. pneumoniae* 13GNB-550.

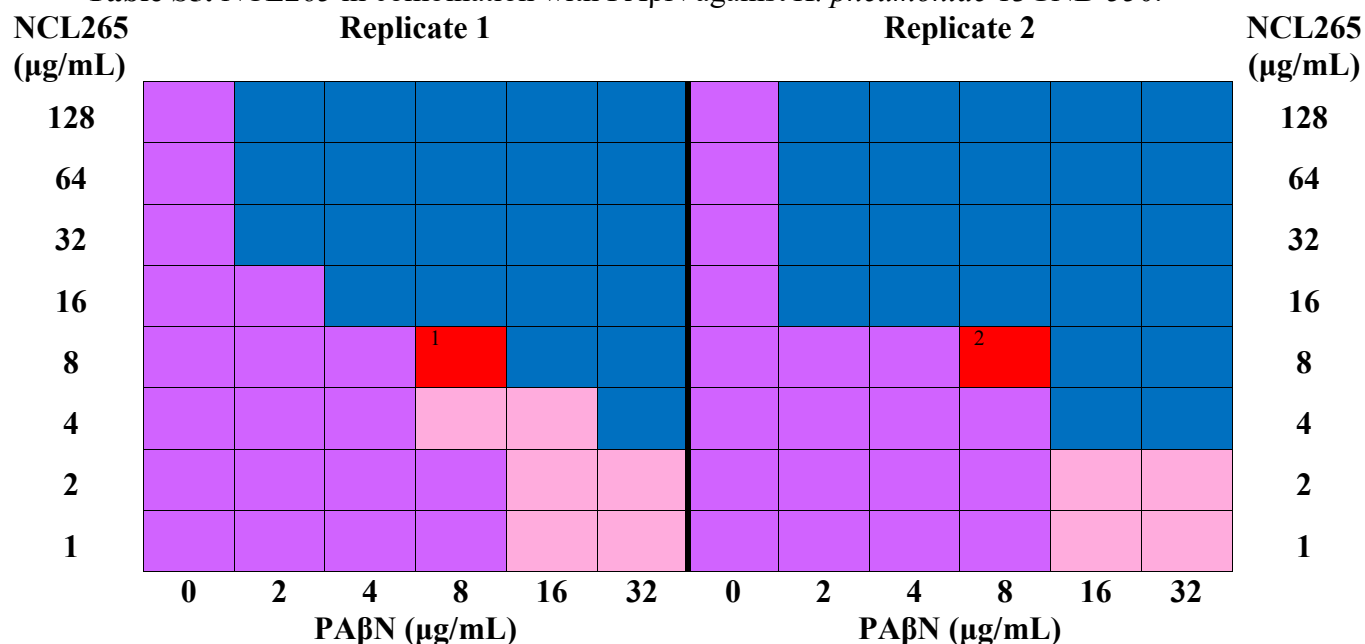

<sup>1</sup> The synergistic interaction of NCL265 at 8 μg/mL and PAβN at 8 μg/mL; <sup>2</sup> the synergistic interaction of NCL265 at 8 μg/mL and PAβN at 8 μg/mL in replicate. Blue and pink indicate the absence or presence of living colonies, respectively.

**Table S6.** NCL265 in combination with PAβN against *K. oxytoca* 13GNB-582.

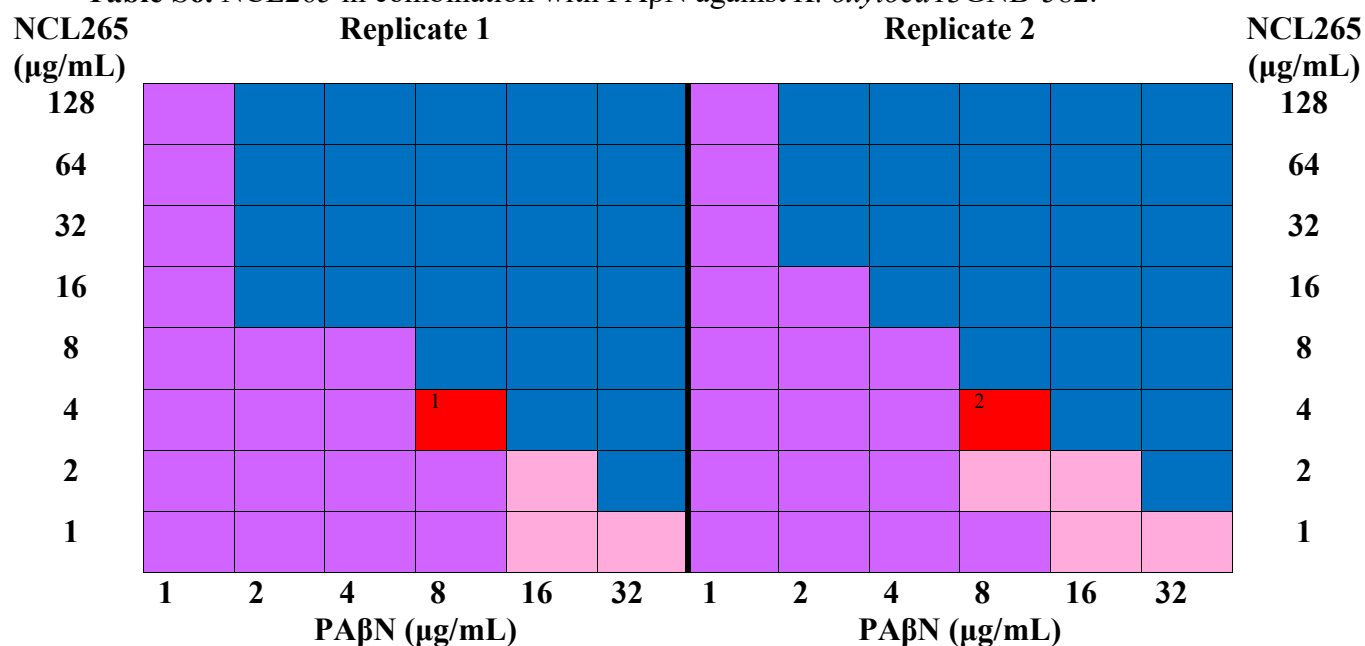

<sup>1</sup> The synergistic interaction of NCL265 at 4 μg/mL and PAβN at 8 μg/mL; <sup>2</sup> the synergistic interaction of NCL265 at 8 μg/mL and PAβN at 8 μg/mL in replicate. Blue and pink indicate the absence or presence of living colonies, respectively.
